# Supplementary material for: The Failure of Instant Runoff to Accomplish the Purpose for Which it was Adopted: A Case Study from Burlington Vermont
Source: Research Square preprint supplement (doi:10.21203/rs.3.rs-2343967/v1), 2022-12-07
Supplement: Supplementary file 1 [file f46ac38ed11e4cc9d14d9195.pdf]

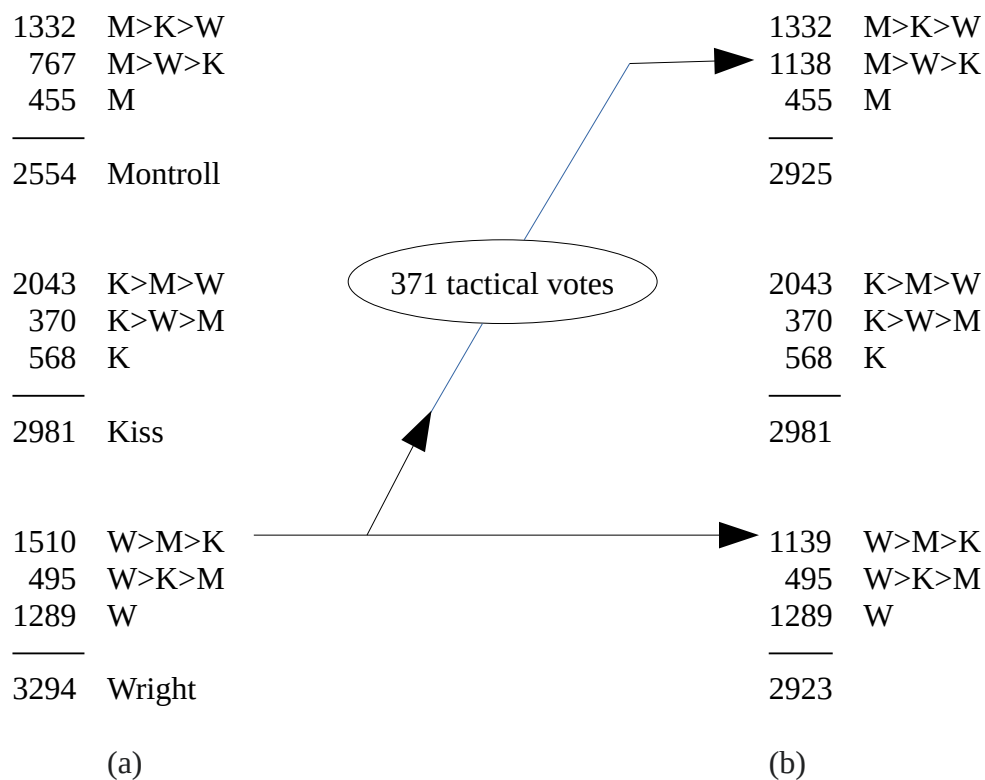

**Table 1** (a) Ballot rankings for the top three candidates in the semifinal round.  
 (b) For the 1510 Wright voters that disliked Kiss the most, had 371 or more of these voters voted tactically, they would have prevented Kiss from winning the IRV election in 2009.
